# Supplementary material for: Cissus verticillata Extract Decreases Neuronal Damage Induced by Oxidative Stress in HT22 Cells and Ischemia in Gerbils by Reducing the Inflammation and Phosphorylation of MAPKs
Source: MDPI journal article supplement (doi:10.3390/plants10061217), 2021-06-15
Supplement: s1 [file s1]

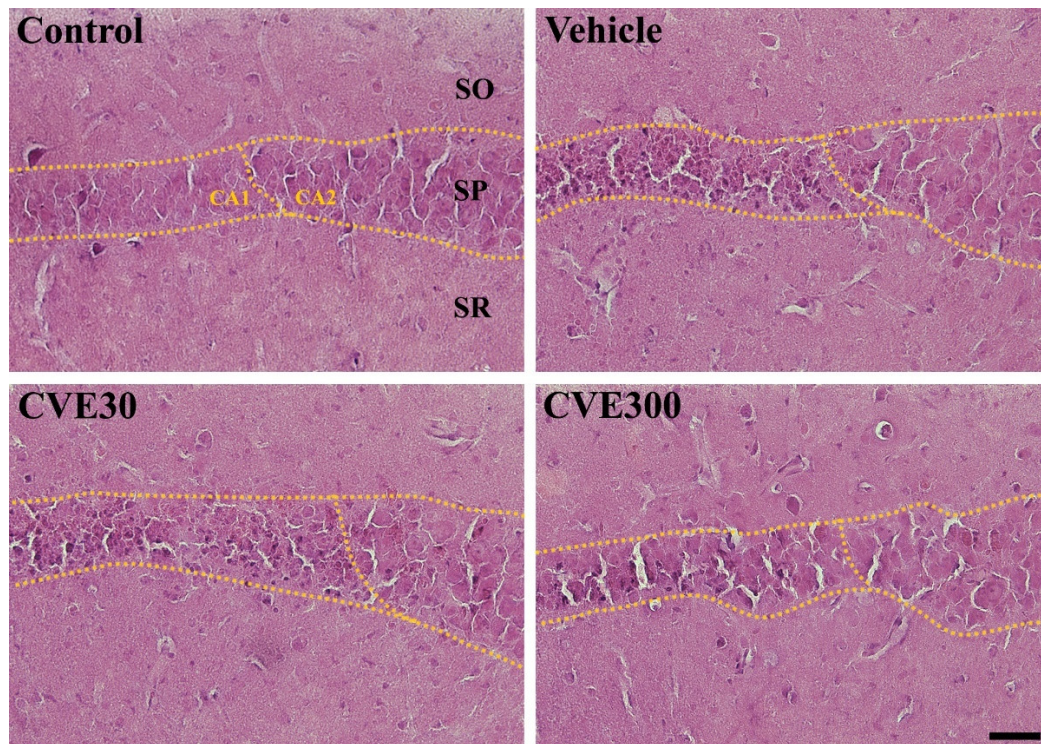

**Supplementary Figure S1.** Hematoxylin and eosin staining in the hippocampal CA1 and CA2 region in the sham-operated (control), ischemia-induced vehicle-treated (vehicle), ischemia-induced 30 mg/kg CVE-treated (CVE30), and ischemia-induced 300 mg/kg CVE-treated (CVE300) groups ( $n = 5$  per group). SO, stratum oriens; SP, stratum pyramidale; SR, stratum radiatum. Scale bar = 50  $\mu$ m.
